# Supplementary material for: Birnessite: A New Oxidant for Green Rust Formation
Source: MDPI journal article supplement (doi:10.3390/ma13173777), 2020-08-26
Supplement: s1 [file s1]

# Supplementary Materials: Birnessite: A New Oxidant for Green Rust Formation

Amira Doggaz <sup>1</sup>, Romain Coustel <sup>1</sup>, Pierrick Durand <sup>2</sup>, François Humbert <sup>1</sup> and Christian Ruby <sup>1,\*</sup>

<sup>1</sup> Université de Lorraine, CNRS, LCPME, 54600 Nancy, France ; amira.doggaz@univ-lorraine.fr (A.D.), romain.coustel@univ-lorraine.fr (R.C.), francois.humbert@univ-lorraine.fr (F.H.), christian.ruby@univ-lorraine.fr (C.R.)

<sup>2</sup> Université de Lorraine, CNRS, CRM2, 54600 Nancy, France, pierrick.durand@univ-lorraine.fr

\* Correspondence: christian.ruby@univ-lorraine.fr

## Supplementary Information

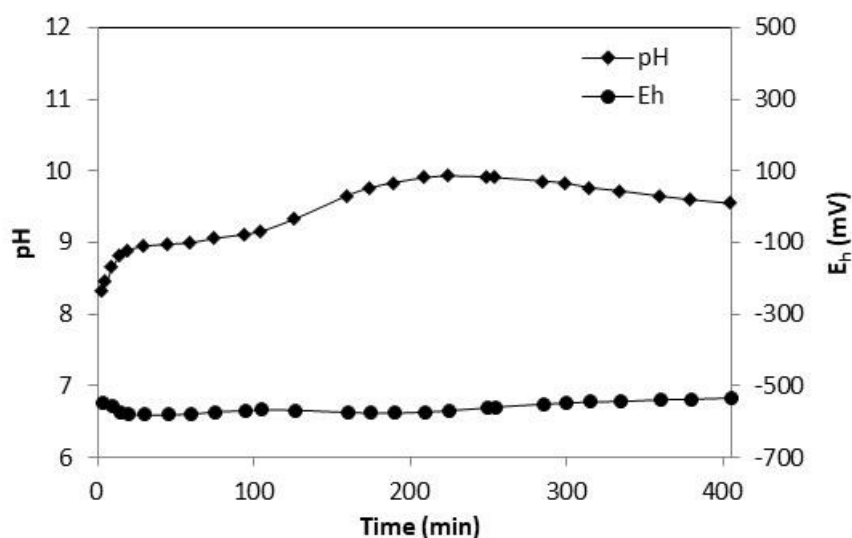

**Figure 1.** Eh and pH vs time for  $R = 0.6$  and  $[Bir] = 5 \text{ g.L}^{-1}$ , under  $N_2$  blanketing. Birnessite added at  $t = 3 \text{ min}$ .

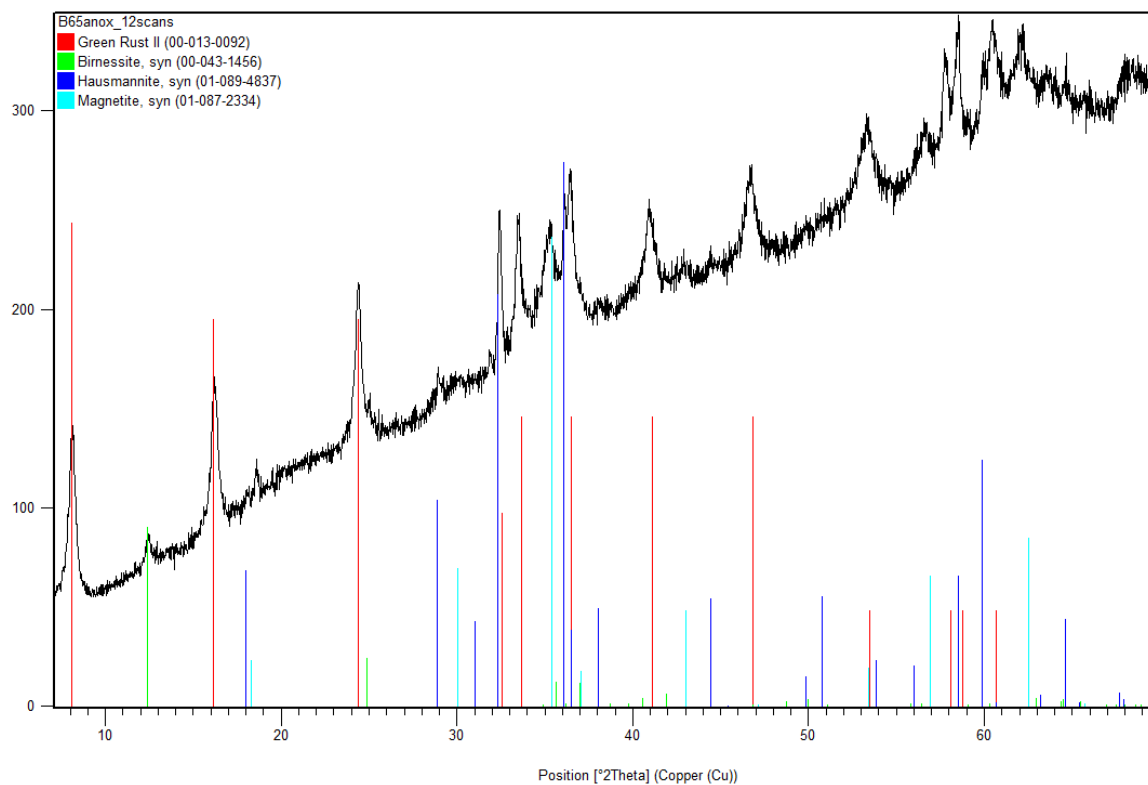

**Figure 2.** XRD patterns of R06B05IN2 (black). Tick marks of the patterns of birnessite (green, ICSD: 00-043-1456), hausmannite (blue, ICSD: 01-089-4837), green rust (red, ICSD: 00-013-0092) and magnetite (cyan, ICSD: 01-089-2355) are also shown as guidelines. The sample was prepared with  $R = 0.6$ ,  $[Bir] = 5 \text{ g.L}^{-1}$ , under  $N_2$  blanketing. Solid product was withdrawn at  $t = 400 \text{ min}$  (see Figure SI 1).

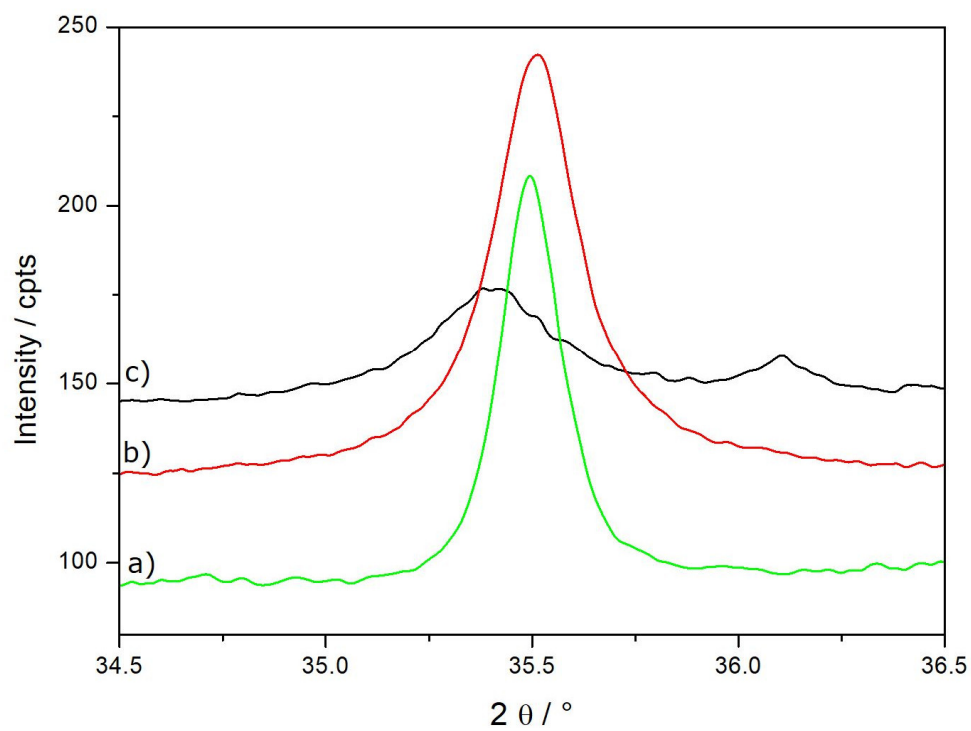

**Figure 3.** XRD patterns (a) R06F (green), (b) R06B02F (red), (c) R06B05F (black) samples. Zoom of Figure 2 in the region of (311) magnetite peak.

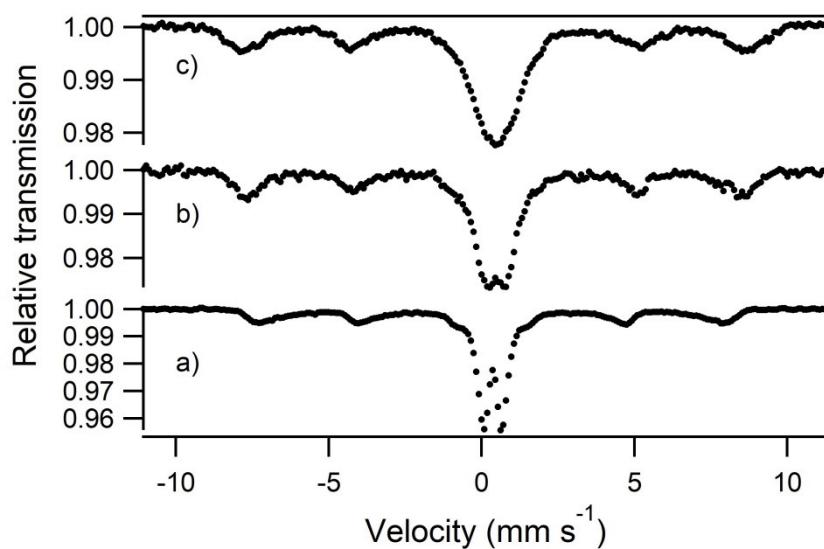

**Figure 4.**  $^{57}\text{Fe}$  Mössbauer spectra of R06B05F recorded at (a) room temperature, (b) 140 K and (c) 77 K.

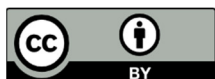

© 2020 by the authors. Licensee MDPI, Basel, Switzerland. This article is an open access article distributed under the terms and conditions of the Creative Commons Attribution (CC BY) license (<http://creativecommons.org/licenses/by/4.0/>).
